# Supplementary material
Source: Springer Nature journal article supplement (https://www.springermedizin.de/resource/supplementary/13041_2012_174_MOESM4_ESM.pdf/25657646)

A

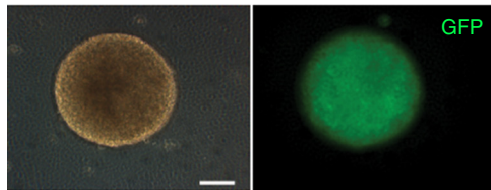

B

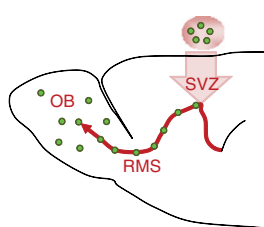

C

Rostral Migratory Stream

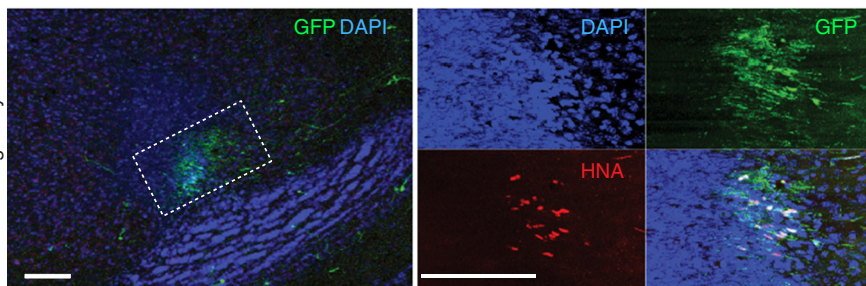

D

Olfactory Bulb

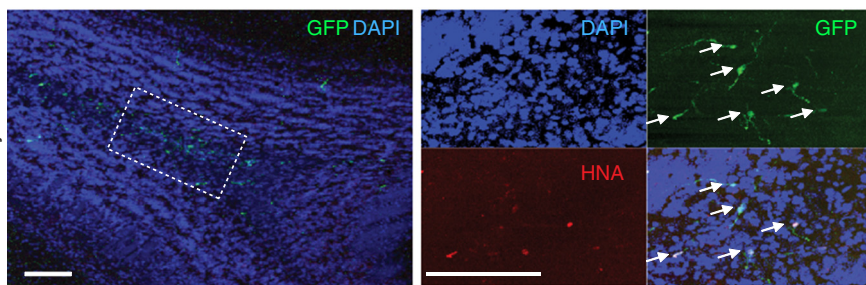

E

Olfactory Bulb

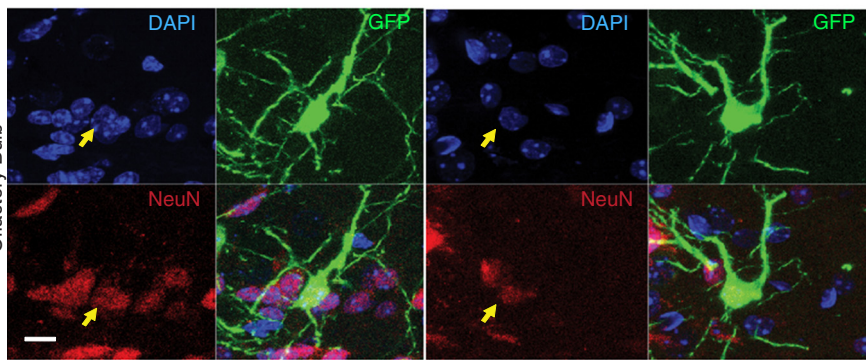

Supplement: MOESM4 [file 25657646]
